# Supplementary material for: Barcode identification for single cell genomics
Source: PubMed Central journal article supplement (PMC6337828; doi:10.1186/s12859-019-2612-0), 2019-01-17
Supplement: 12859_2019_2612_MOESM1_ESM.pdf [file 12859_2019_2612_MOESM1_ESM.pdf]

S1

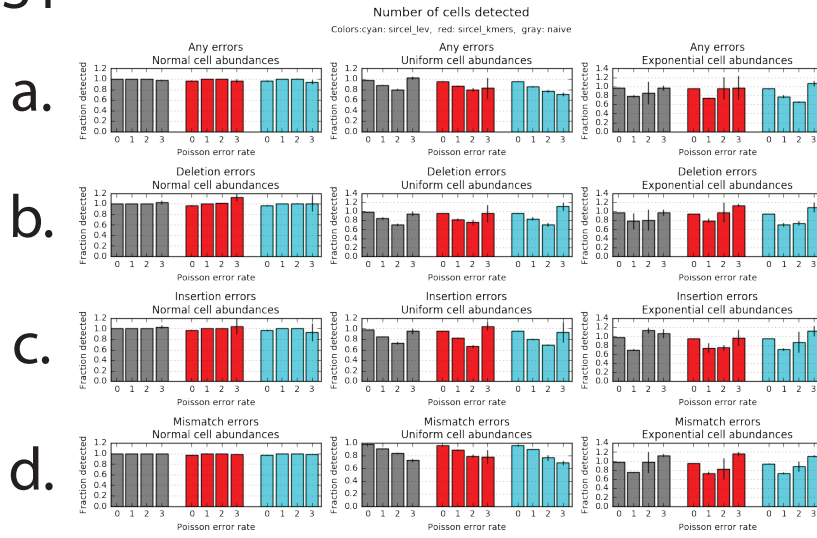

S2

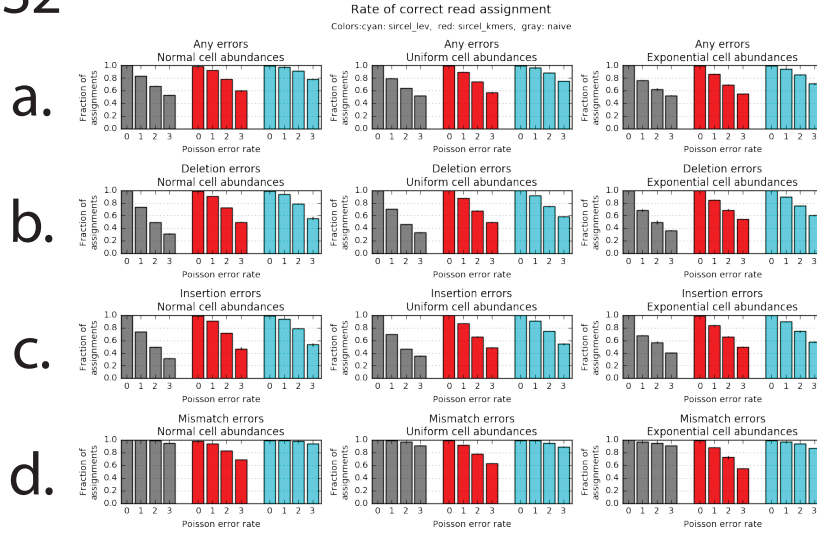

S3

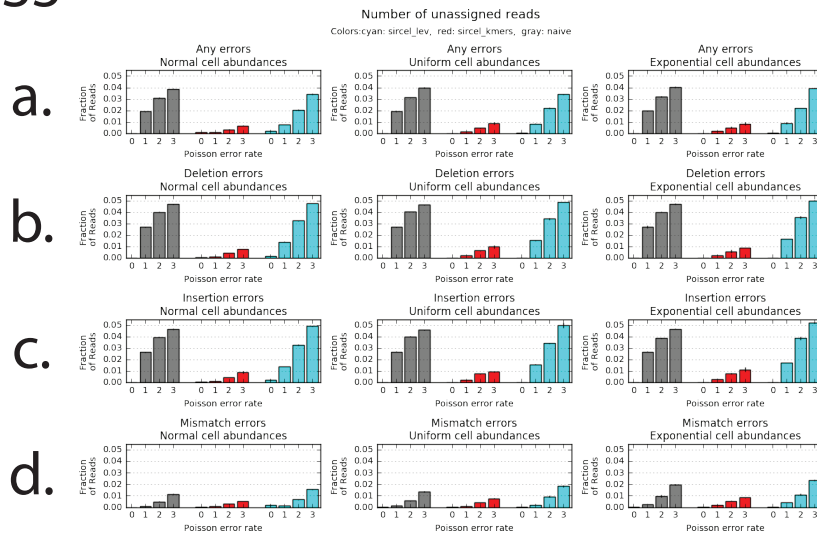

# S4

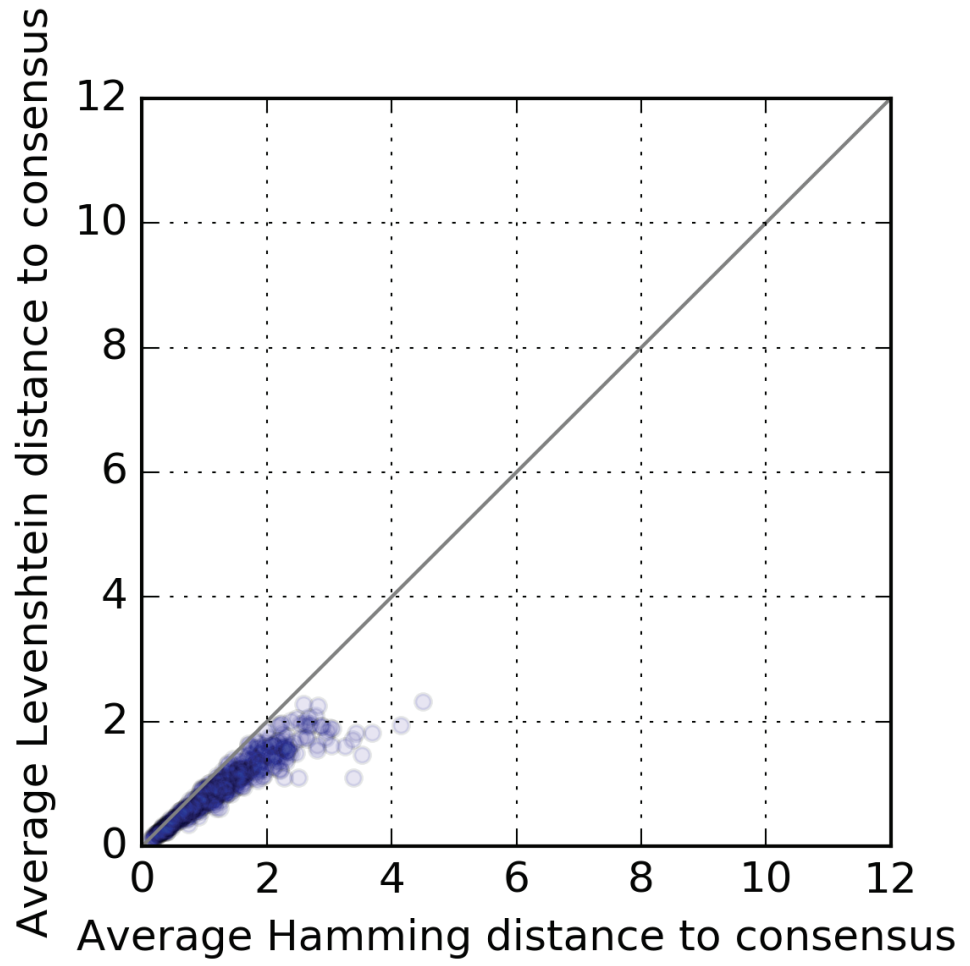

S5

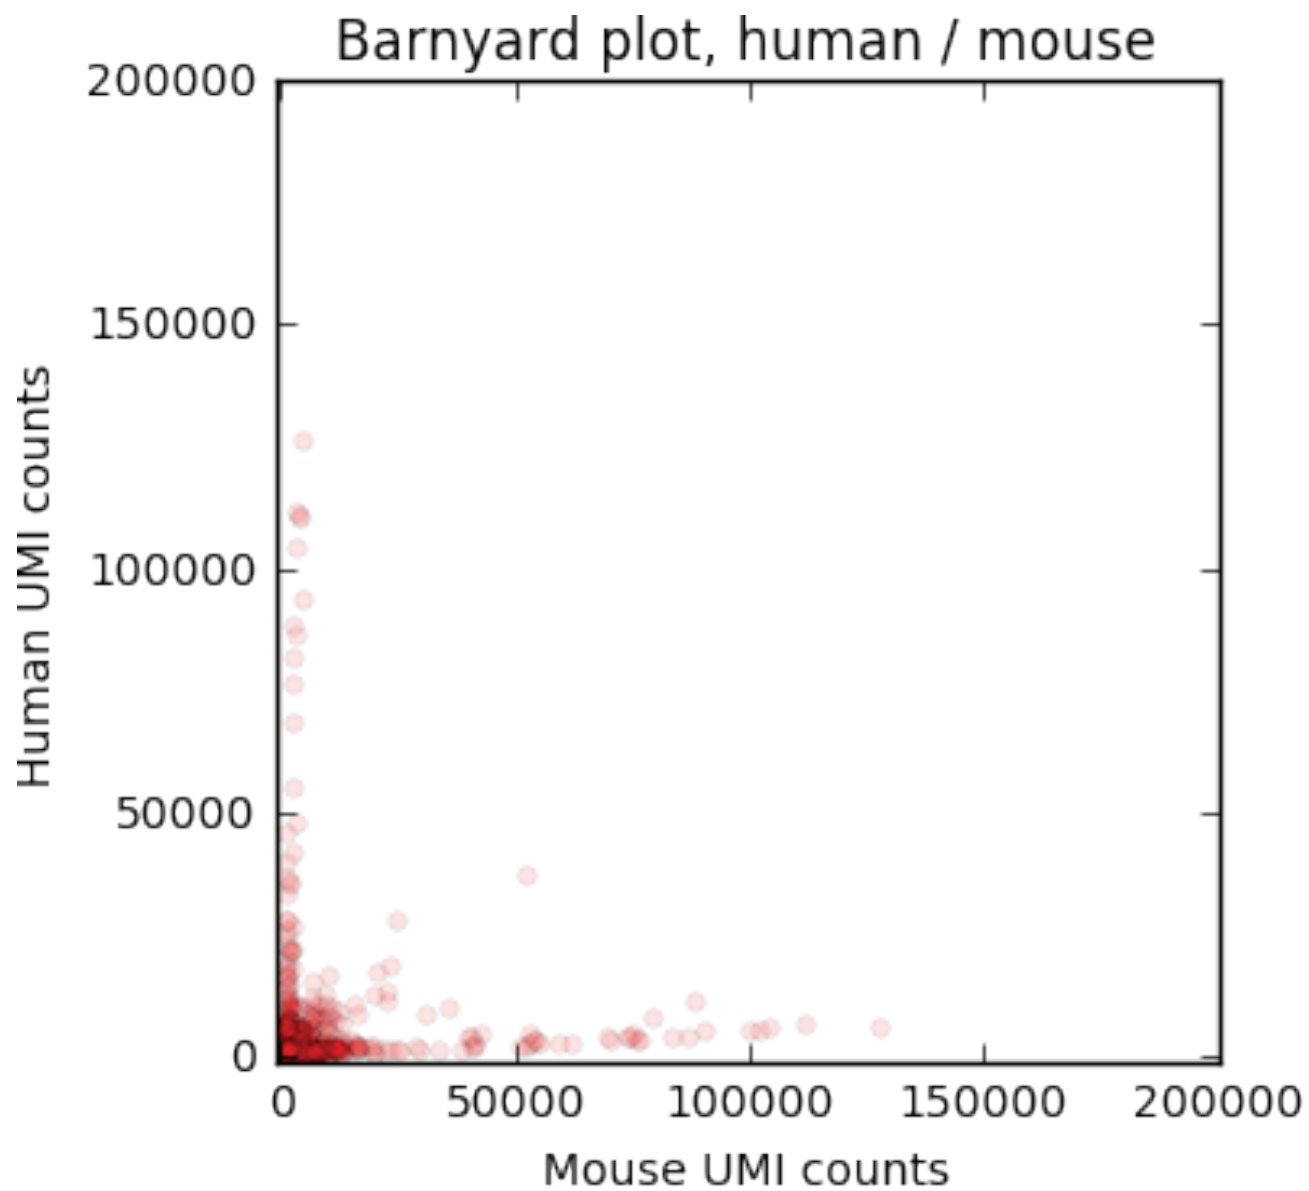

A.

Cyclic kmer graphs for 10 barcode(s)

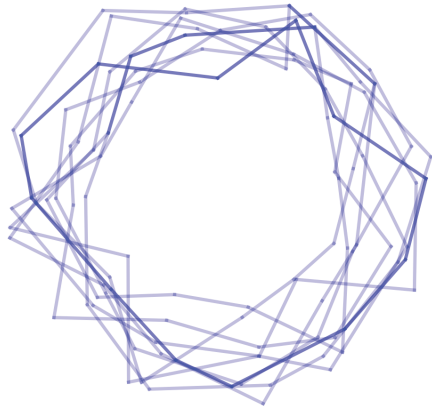

10 reads

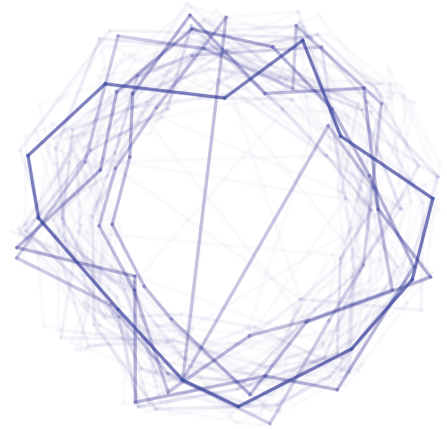

100 reads

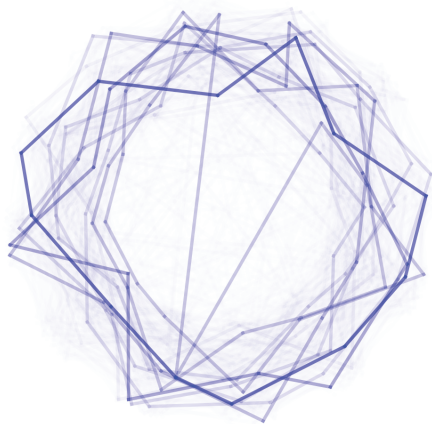

1000 reads

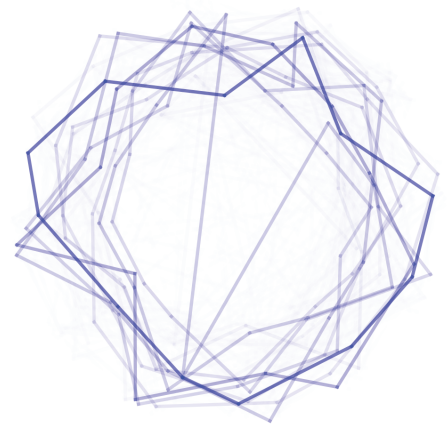

15000 reads
